# Supplementary material
Source: Springer Nature journal article supplement (https://www.springermedizin.de/resource/supplementary/12889_2010_3175_MOESM1_ESM.pdf/9488350)
Supplement: MOESM1 [file 9488350]

**Men**

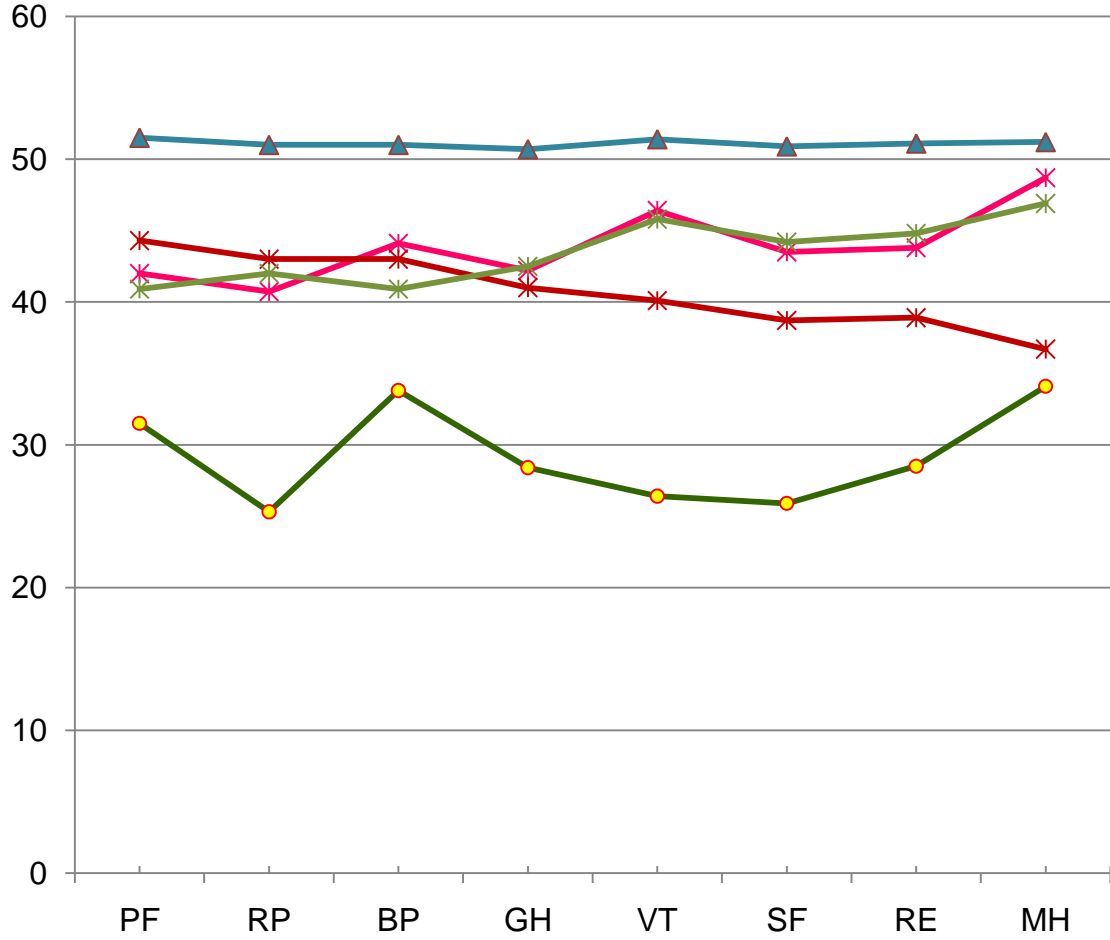

- ▲ Normalised - healthy
- \* Cancer
- \* Depression
- \* RA
- ME/CFS

**Women**

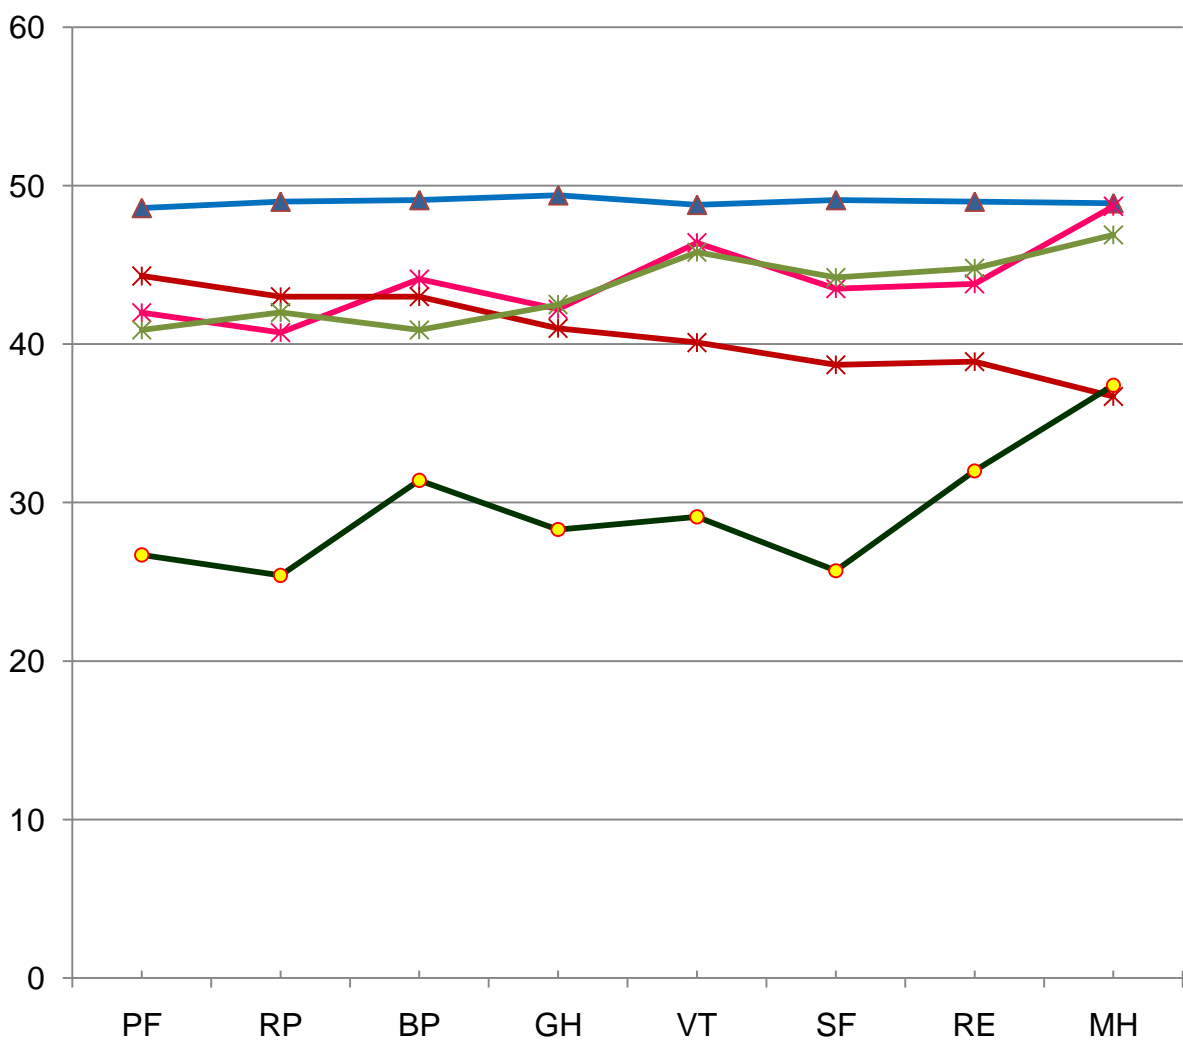

- ▲ Normalised - healthy
- \* Cancer
- \* Depression
- \* RA
- ME/CFS
